# Supplementary material
Source: PubMed Central journal article supplement (PMC5622874)
Supplement: 2017_171108-Disclosures_and_Contributions.pdf [file 2017_171108-Disclosures_and_Contributions.pdf]

Haematologica  
HAEMATOL/2017/171108  
Version 3

Genome-wide association study of clinical parameters in  
immunoglobulin light chain amyloidosis in three patient cohorts

Iman Meziane, Stefanie Huhn, Miguel Inacio da Silva Filho, Niels Weinhold, Chiara Campo, Jolanta Nickel, Per Hoffmann, Markus M Nöthen, Karl-Heinz Jöckel, Stefano Landi, Jonathan S Mitchell, David Johnson, Anna Jauch, Gareth J Morgan, Richard Houlston, Hartmut Goldschmidt, Paolo Milani, Giampaolo Merlini, Dorota Rowcieno, Philip Hawkins, Ute Hegenbarth, Giovanni Palladini, Ashutosh Wechalekar, Asta Försti, Stefan O Schönland, and Kari Hemminki

Disclosures: The authors declare no competing financial interests.

Contributions: K.H., S.S. and A.F. designed and provided overall project management. K.H. drafted the manuscript. I.M. and M.I.d.S.F. carried out statistical and bioinformatics analyses. S.H., N.W., J.N. and U.H. oversaw the collection of the German amyloidosis patient material and data, P.M., G.M. and G. P. were responsible for the Italian data, and D.R., P.H. and A.W. were responsible for the UK data. J.S.M., D.J., G.J.M. and R.H. provided the UK myeloma data, H.G. provided the German myeloma data, K.-H.J. provided the German control population and S.L. provided the Italian control population. P.H., M.M.N. and C.C. conducted German GWAS analysis and A.J. was responsible for FISH analyses. All authors contributed to the final paper.
